# 1 **Effects of reward history on decision-making and movement vigor**

2 **Shruthi Sukumar<sup>1</sup>, Reza Shadmehr<sup>3</sup>, Alaa A. Ahmed<sup>2</sup>**

3 **Department of Computer Science, University of Colorado Boulder<sup>1</sup>**

4 **Department of Mechanical Engineering, University of Colorado Boulder<sup>2</sup>**

5 **Department of Biomedical Engineering, Johns Hopkins University<sup>3</sup>**

## 7 **Abstract**

8 During foraging, animals decide how long to stay and harvest reward, and then abandon that site and travel  
9 with a certain speed to the next reward opportunity. One aspect of this behavior involves decision-making,  
10 while the other involves motor-control. A recent theory posits that control of decision-making and  
11 movements may be linked via a desire to maximize a single normative utility: the sum of all rewards  
12 acquired, minus all efforts expended, divided by time. If this is the case, then the history of rewards, and  
13 not just its immediate availability, should dictate how long one decides to stay and harvest reward, and how  
14 slowly one travels to the next opportunity. We tested this theory in a series of experiments in which humans  
15 used their hand to harvest tokens at a reward patch, and then used their arm to reach toward a subsequent  
16 opportunity. Following a history of poor rewards, people not only foraged for a longer period, but also  
17 moved slower to the next reward site. Thus, reward history had a consistent effect on both the decision-  
18 making process regarding when to abandon a reward site, and the motor control process regarding how fast  
19 to move to the next opportunity.

20

## 21 **Introduction**

22 Movements tend to be faster toward stimuli that promise a greater utility. For example, as the expectation  
23 of reward increases, peak speeds of both saccadic eye movements and reaching movements tend to increase  
24 (Haith et al., 2012; Rigoux & Guigon, 2012; Shadmehr et al., 2016; Summerside et al., 2018; Takikawa et  
25 al., 2002; Thura et al., 2014). Similarly, as the effort cost of acquiring reward increases, speed of walking  
26 and reaching movements tends to decline (Gordon et al., 1994; Ralston, 1958; Schweighofer et al., 2015;  
27 J. Wang et al., 2021). Why does the prospect of greater reward invigorate movements?

28 One possibility is that by controlling movement vigor the brain is attempting to maximize an ecologically  
29 relevant utility: the reward that is expected at the successful conclusion of the act, minus the energetic  
30 expenditure required to perform that act, divided by time (Shadmehr et al., 2016). In this framework, faster  
31 movements are discouraged because they require greater energetic expenditure (Gordon et al., 1994;  
32 Ralston, 1958; Summerside et al., 2018). However, when there is reward at stake, faster movements save  
33 time, which reduces the discounted value of reward. When greater reward is at stake, the time that is saved  
34 by a faster movement may justify its energetic cost, and thus its vigor.

35 The mathematical formulation of this utility, reward minus effort divided by time, is the same as the one  
36 used by ecologists who study decision-making of animals during foraging (Stephens & Krebs, 1986). In  
37 many of those studies, the objective is to understand why the animal decides to abandon a harvest site and  
38 move to another opportunity (Cowie, 1977; Richardson & Verbeek, 1987). Optimal foraging theory  
39 operates on the notion that duration of harvest depends not only on the reward that is locally available, but  
40 also on the history of the subject, i.e., the past actions and their consequences (Stephens & Krebs, 1986).  
41 For example, marginal value theorem, or MVT (Charnov, 1976), a method that finds foraging durations  
42 that maximize the global utility, predicts that if in the past the subject has enjoyed rich rewards, then it  
43 should abandon the current foraging site sooner, as compared to when the past has been one of scarcity.  
44 Indeed, animal studies have found a consistent effect of environment quality on behavioral parameters such  
45 harvesting duration and response latency (Cuthill et al., 1990; Niv et al., 2007; Perry et al., 2016; A. Y.  
46 Wang et al., 2013).

47 While studying saccadic eye movements and gaze behavior in humans, we suggested a generalized version  
48 of MVT to account for control of movement vigor (Yoon et al., 2018). The essence of the generalized  
49 theorem is that actions, whether they be in the context of harvesting, or moving between sites, should be  
50 controlled by a single global utility: the sum total of rewards and efforts, divided by time (Figure 1a). The  
51 generalized theory predicts that in environments in which rewards are plentiful or require little effort, the  
52 subject should not only abandon the reward site sooner, but also move with greater vigor toward the next  
53 opportunity (Figure 1b). That is, the rewarding outcomes and effort expenditures of past actions should  
54 have a consistent effect on both decision-making, and movement control.

55 While classical MVT has been empirically tested via examination of decision-making patterns (Constantino  
56 & Daw, 2015; Cowie, 1977; Hayden et al., 2011; Krebs et al., 1974; Le Heron et al., 2020), the generalized  
57 predictions regarding the effects of history on motor control have yet to be tested. Here, we designed two  
58 foraging experiments in which we varied the history of reward and effort. Subjects used their hand to harvest  
59 tokens at a reward patch, and then used their arm to reach to the next patch. In each experiment, subjects  
60 performed these reach-and-harvest trials in various conditions: in rich environments where rewards were  
61 plentiful (or low effort expenditure associated with reaches between patches), or in poor environments  
62 where rewards were scarce (or high effort expenditure). Critically, in both environments we placed probe  
63 trials in which we controlled the availability of the immediate reward and the efforts required for attaining  
64 that reward. Theory predicted that when comparing behaviors in probe trials, the history of past actions, as

65 reflected in the richness of the environment, should affect both reach vigor, and harvest duration. Indeed,  
 66 following an experience of rich rewards, people not only reached with greater vigor in probe trials, they  
 67 also abandoned those rewards sooner.

68

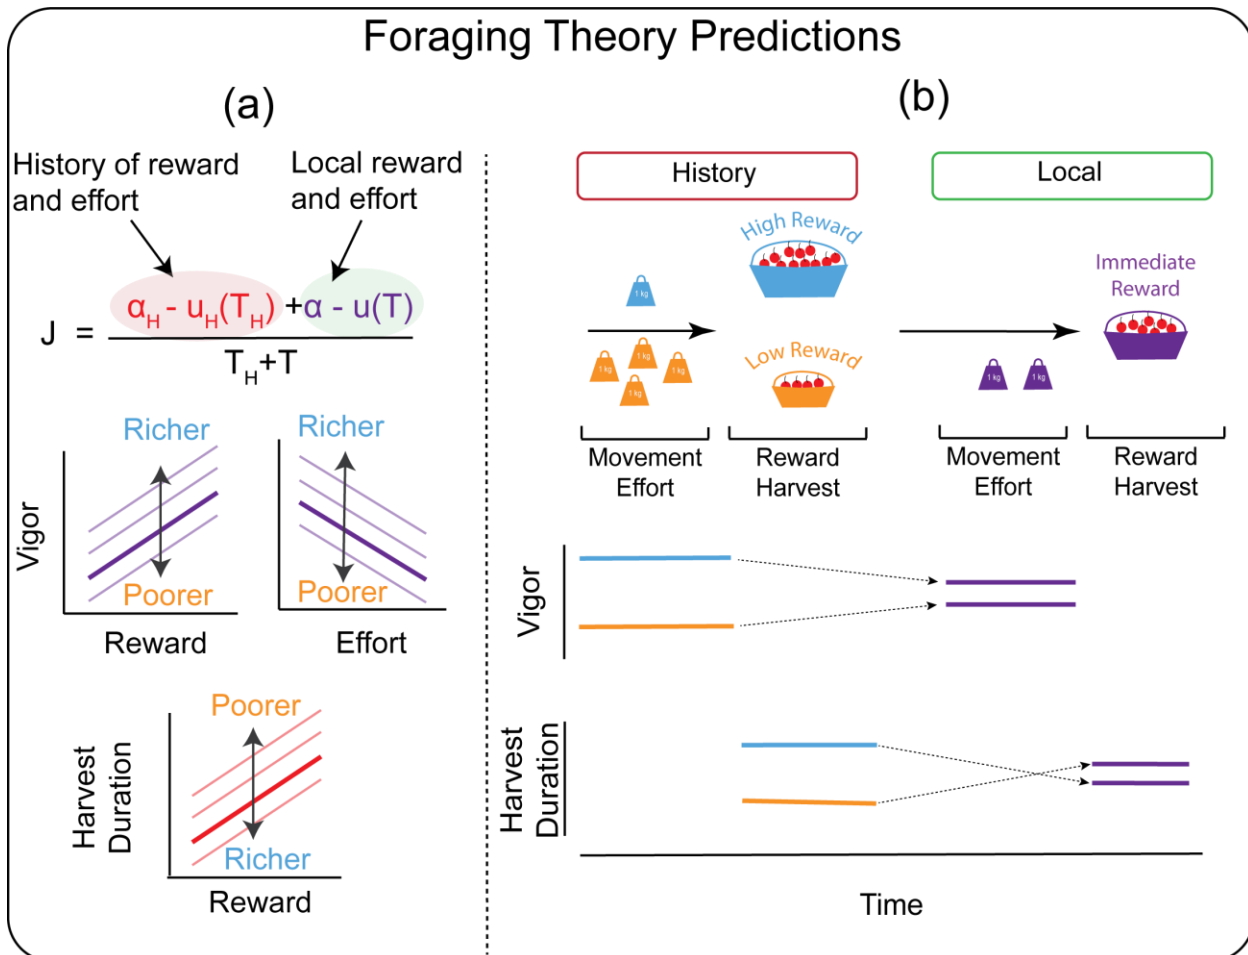

69 Figure 1: (a, b) Generalized MVT predictions for control of movement vigor and harvest duration (a) Richer environment  
 70 with history of high reward or low effort will elicit higher vigor. But richer environments will also elicit lower harvest  
 71 duration. (b) After a history of low effort or high reward, the vigor of the current movement will increase as compared to  
 72 a history of high effort and low reward. Similarly, after a history of high reward and low effort, harvest duration will  
 73 decrease as compared to history of low reward and high effort. Note that while environmental richness is positively  
 74 correlated with vigor, it is negatively correlated with harvest duration, despite immediate reward increasing both.

## 75 Results

76 In a foraging task (Experiment 1, Figure 2c), subjects held a robotic manipulandum and used their hand to  
 77 apply force pulses that produced tokens (virtual berries) at reward patches (the berries were exchanged into  
 78 a monetary bonus at the end of the experiment). There were three patch types, indicated by their color, with  
 79 differing reward rates (low, medium, and high, Figure 2d). As they stayed within a patch and continued to  
 80 harvest, the number of berries that we delivered with each pulse decayed (Figure 2c, third panel), thus  
 81 encouraging them to leave. Their decision to leave was aided by the fact that as they harvested, the location  
 82 and reward rate of the next patch was displayed, making it possible for them to leave the current patch and  
 83 reach to the next patch when they wished to.

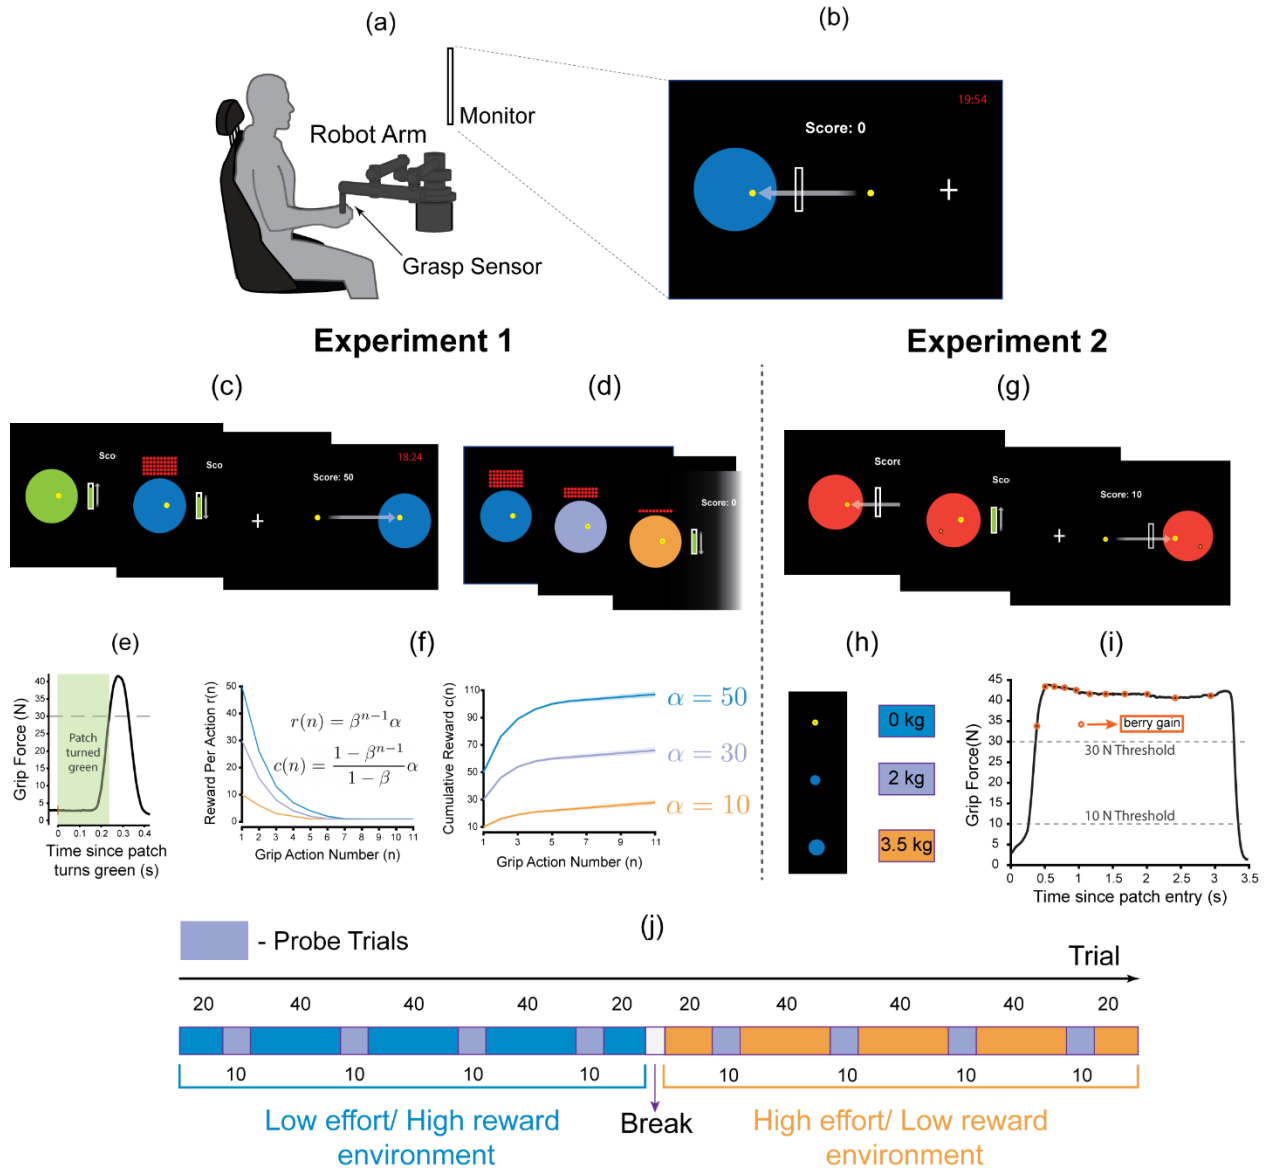

84 Figure 2: Experiment design. (a) Participants were seated in front of a computer monitor while grasping the handle of  
 85 a robotic arm. The robot handle housed a sensor that measured grip force. (b) They used the robot to move the cursor  
 86 and place it inside the target (“patch”) to earn reward (berries). In **Experiment 1**, we varied the amount of reward at  
 87 each patch. (c) Once in the patch, harvesting would commence by waiting for 1 second (green light), and then producing  
 88 a force pulse. Each subsequent grip pulse had to wait for 1 sec and was rewarded with an exponentially reduced  
 89 number of berries. The number of berries collected was added to a running score, which was displayed on the screen.  
 90 Subjects were free to stop harvesting and move to the next patch at any time. (d) The richness of each patch was cued  
 91 by a specific color. (e) Example of a grip pulse resulting in berry harvest. (f) Different reward functions for the three  
 92 patch types plotted wrt number of grips applied within the patch (left). Cumulative rewards for the three patch types  
 93 as a function of grip number within patch (right). In **Experiment 2**, we varied the effort required to travel between patches.  
 94 (g) A red ‘patch’ served as the cue, instructing the subject to move the cursor to collect reward. Once in the patch they  
 95 increased grip force to a threshold (bar height) to commence harvesting. During harvesting, grip force had to be  
 96 maintained above threshold ( $F_g = 30N$ ) to continue berry collection. Subjects could move out at any point to the next  
 97 patch. (h) To modulate effort cost of travel between patches, we added a mass to the reaching movements, indicated  
 98 by a circle that was proportionately sized to the mass and appeared over the cursor. (i) Example grip force profile;  
 99 subjects had to hold force above ( $F_g = 30N$ ) to collect berries indicated by orange circles. (j) Protocol for both  
 100 experiments. Each rectangle represents a contiguous block of trials with corresponding number of trials indicated. Note

101 that for experiment 1 each environment included probe trials and was conducted for a fixed amount of time (20 minutes),  
102 with the remaining time displayed in the upper right corner of the screen.

103 The key variables were the length of time they decided to stay and harvest, and more importantly, the  
104 velocity with which they reached to the next reward patch. We hypothesized that these variables depended  
105 not only on the reward properties of the current patch, but also reward history. To control the reward history,  
106 the patches were organized so that the subjects initially experienced either a poor (e.g., most patches  
107 containing a small amount of reward, Figure 2j) or a rich environment. In addition, in both environments  
108 subjects also encountered probe trials in which the immediate reward rate was kept constant (medium).  
109 These probe patches allowed us to measure the effect of past reward rate while controlling for the immediate  
110 reward. Subjects were given a fixed amount of time (20 min) to complete each environment (Figure 2h)  
111 and were familiarized with the various patches before the main experiment.

### 112 **History of high reward led to faster movements, and earlier abandonment of the reward** 113 **patch**

114 Subjects reached faster toward patches that promised a greater immediate reward, as shown for a  
115 representative subject in Figure 3a, and across subjects in Figure 3b ( $F(1,1104) = 80.225, p < 2 * 10^{-16}$ ).  
116 However, when the promise of reward was equalized (probe trials), reach speed depended on the history of  
117 the subject: following a history of high reward trials, reach speed in probe trials was greater than following  
118 a history of poor reward trials [peak velocity in probe trials following a high reward environment as  
119 compared to the low reward environment,  $F(1,264) = 13.661, p = 0.0002$ ] (Figures 3b and 3c). Thus, the  
120 history of reward affected reach vigor: reach velocity was higher in probe trials that followed a sequence  
121 of high reward experiences.

122 Once the hand entered a reward patch, the subjects produced a series of force pulses to collect berries (one  
123 pulse per set of berries). Figure 3d provides an example of the force pulses, and the number of berries  
124 collected following each pulse (red dots atop each pulse). The raster in Figure 3e provides an example of  
125 harvest behavior in the rich and poor environments, as well as in the probe trials (same subject as in Figure  
126 3a). As expected, the subject stayed longer in the high reward patch as compared to the low reward patch,  
127 a pattern that was consistent across subjects (harvest duration was longer in the high reward patch, Figure  
128 3g;  $F(1,1104) = 632.4, p < 2 * 10^{-16}$  and more berries were collected;  $F(1,1104) = 10838, p < 2 * 10^{-16}$ ).  
129 However, the length of harvest in probe trials depended on the history of the subject; they  
130 abandoned the harvest location sooner if the past was one of high rewards. Indeed, after a history of high  
131 reward the subjects chose to stay for a shorter period in the probe patch (Figure 3h,  $F(1,264) =$   
132  $37.134, p < 3.8 * 10^{-9}$ ), and collected fewer berries (Figure 3i,  $F(1,264) = 63.077, p < 5 * 10^{-14}$ ), as  
133 compared to the probe patch that followed low rewards. In other words, given the same amount of  
134 immediate reward (i.e., probe trials), if the history was one of high reward the subjects tended to abandon  
135 the current patch earlier, thus leaving with fewer berries.

136 As they harvested rewards, subjects could see the location of the next patch and whether it contained high,  
137 medium, or low rewards. This allowed us to examine whether the prospect of future rewards affected  
138 behavior at the current patch. We noticed a curious change in behavior in the trial just before the onset of  
139 the probe patch: during the final harvest in the high reward patch, subjects lingered longer than normal if  
140 the next patch was a probe trial (harvest duration, trial 19 vs. 20,  $t(13) = 3.258, p = 0.0062$ ). In other  
141 words, just before moving to a relatively poor patch (probe trial), subjects stayed longer than usual in the  
142 high reward patch. This transition from high reward patches to a probe patch also produced a relatively  
143 slow reaching movement (as compared to reaches to probes that were preceded by other probes,  $t(13) =$   
144  $-2.188, p = 0.0475$ ). Similarly, when the next patch contained a relatively greater amount of reward

145 than the current one, harvest duration was shorter than normal (final harvest in the low reward environment  
146 when the subsequent patch was probe,  $t(13) = -3.53, p = 0.0037$ ). Thus, the harvest duration was longer  
147 than usual if the promise of future reward was lower than the current rate.

148 In summary, immediate reward affected harvest duration and reach vigor: in the high reward environment  
149 people lingered longer at each patch (as compared to low reward), and then reached with greater vigor  
150 toward the next high reward patch. In addition, the history of reward also affected these variables: following  
151 a low reward history, people lingered longer at the probe site, and then reached with reduced velocity to  
152 their next opportunity. Thus, as theory had predicted, a history of high reward encouraged earlier  
153 abandonment of the current reward patch, and faster movements toward the next patch.



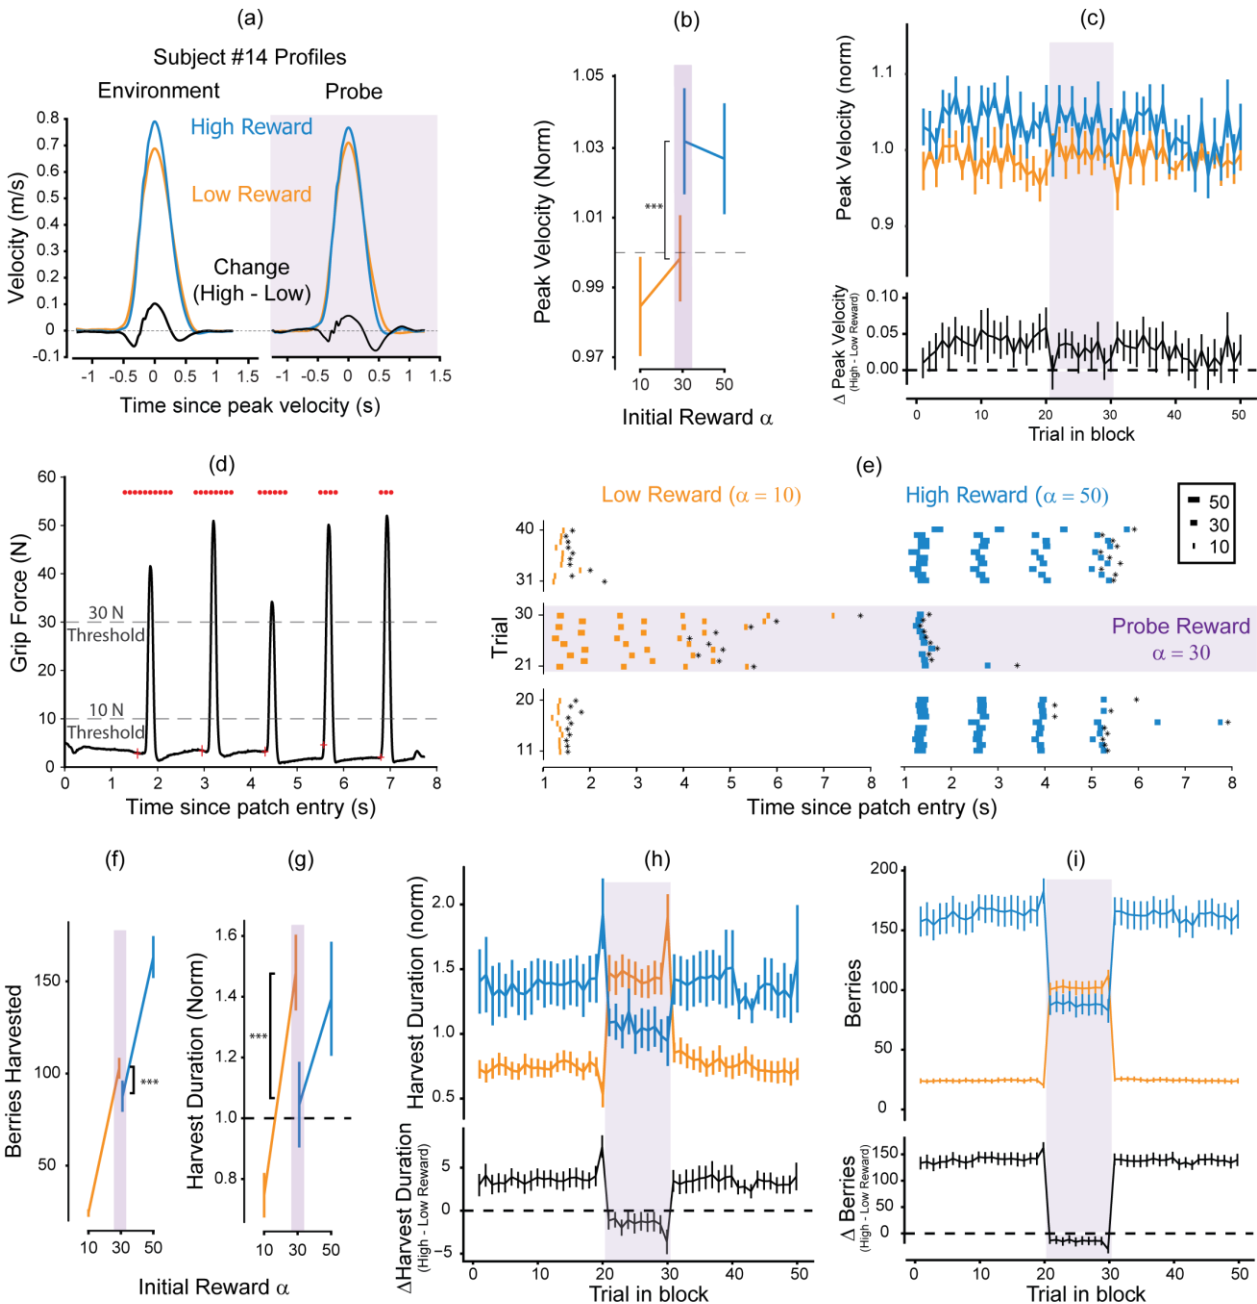

154 Figure 3: (a) Velocity profile averaged across trials belonging to each environment for a representative subject; probe  
 155 trials are separated out for each environment. (b) Normalized peak velocity plotted with respect to reward in patch on  
 156 the current trial; each point represents the average of the mean normalized peak velocity across all subjects. Subjects  
 157 are faster in probe trials belonging to high reward environment (\* p < 0.05, \*\*\* p < 0.001). (c) Mean peak velocity  
 158 (normalized to subject average) within a block of 50 trials, averaged across subjects, plotted as a function of trial for  
 159 the low (blue) and high (yellow) effort environments. Corresponding difference  $\Delta PV$  is plotted with respect to trial  
 160 number within block right below. All error bars represent standard error of the mean. (d) A sample grip force profile  
 161 for an example subject #14 on a randomly selected trial to indicate the temporal course when inside a patch. In this case,  
 162 subject is harvesting from a low reward patch; initial patch reward is 10 and successively decreases with grip actions.  
 163 (e) Raster plot showing berries harvested in 30 representative trials per environment including for Subject #14. Each  
 164 row represents a trial. Annotated trials are probe trials with equivalent reward across environments. Each point  
 165 represents a harvest with the thickness of the point represents the number of berries harvested. Time of departure from  
 166 patch is indicated by the asterisk for corresponding trial. (f,g) Berries harvested (w) and harvest duration (normalized

167 to subject average; f) plotted as a function of patch initial reward  $\alpha$ . Comparing metrics between the probe patches'  
168 average between the two environments showed subjects left patches sooner after history of high reward. (h,i) Mean  
169 number of berries (g) and mean harvest duration, normalized to subject average (h) within a block of 50 trials, averaged  
170 across subjects, plotted as a function of trial for the low (blue) and high (yellow) effort environments. Corresponding  
171 difference is plotted with respect to trial number within block right below. All error bars represent standard error of the  
172 mean.

### 173 **A history of high effort expenditure encouraged slower reaching movements**

174 In experiment 2, we shifted our focus from history of reward to history of effort expenditure. We did this  
175 by simulating an added mass on the hand as the subjects reached between patches (via an acceleration-  
176 dependent resistive force field). Like experiment 1, subjects foraged for discrete rewards by reaching  
177 towards them (Figure 2f). Unlike experiment 1, once at a patch they applied a constant grip force to obtain  
178 reward. As before, they were free to stop the harvest and leave for the next patch at any time (Figure 2f,  
179 third panel). They experienced three added mass conditions over the course of the experiment which were  
180 cued through the appearance of the cursor (Figures 2g). In addition, they foraged in two environments: a  
181 high effort environment (3.5 kg mass) and a low effort environment (0 kg mass). In each environment, there  
182 were intermittent probe trials (2 kg), which allowed us to compare behavior between environments when  
183 the immediate effort requirements were the same, but history of effort differed.

184 As expected, subjects reached faster when carrying a small mass as compared to a large mass (effect of  
185 environment effort on peak velocity, as illustrated by data from a single subject in Figure 4a, and group  
186 data in Figure 4b [ $F(1,1420) = 3828.4, p < 2 * 10^{-16}$ ]). More importantly, the history of effort affected  
187 their reaching movements: reach velocity was higher in probe trials when those trials were embedded in an  
188 environment in which effort costs were low (Figure 4b, [ $F(1,1420) = 27.31, p < 3.03 * 10^{-7}$ ]). Thus, as  
189 expected the subjects reached slower if the mass on the probe trial was greater than the trials that  
190 immediately preceded. However, this reach speed was faster if the probe trial was embedded in a low effort  
191 environment as compared to a high effort environment.

192 Interestingly, the effect of effort history on vigor was not uniform across all subjects (Figure 4d).  
193 Specifically, five of the 18 subjects presented a slight or strong increase in probe trial vigor in the high  
194 effort environment. One possible explanation for this is that, despite the available reward and reward rate  
195 being uniform in patches across both environments, subjects valued the reward in the high effort  
196 environment more by the virtue of having spent more effort to acquire it. This is addressed further in the  
197 Discussion section.

198 Upon entering a patch, subjects increased their grip force to the threshold required for harvesting. This  
199 threshold remained constant despite the varying effort requirements (i.e., masses) of the environment.  
200 Interestingly, subjects altered the rate at which they increased their grip force (grip ramp-up phase in Figure  
201 5a) based on the effort history of the environment: in the probe trials that were placed in the high effort  
202 environment, the rate of increase in grip force tended to be slower.

203 Two examples of harvesting trials are shown in Figure 5b. This subject increased their grip force faster in  
204 the context of the low effort environment. We quantified this behavior by measuring the rate of force  
205 increase as well as the duration of time it took to ramp force from 10 N to the threshold of 30 N. (Subjects  
206 were required to maintain their force below 10 N before they enter the patch thereby determining the lower  
207 threshold.) We found that on average, peak rate of force was higher in trials belonging to the low effort  
208 environment as opposed to the high effort environment [example subject Figure 5c; two-way repeated  
209 measures ANOVA, main effect of environment on peak force rate  $F(1,264) = 5.714, p = 0.0175$ ]. When  
210 we focused on probe trials, we found that peak force rate in the context of the low effort environment was



211 higher than in the context of the high effort environment [Figure 5d–e; two-way repeated measures  
212 ANOVA, effect of environment effort on probe trials,  $F(1,1382) = 17.442, p < 0.001$ ]. When  
213 considering the correlated metric of grip ramp-up duration we see an interaction between environment effort  
214 and trial type [two-way repeated measures ANOVA on all trials reveals a slightly significant interaction  
215 between environment effort and trial type,  $F(1,264) = 3.851, p = 0.05076$ ]. Focusing once again on just  
216 the probe trials we found a significant effect of environment effort on grip ramp-up duration [Figures 5f–  
217 g;  $F(1,1382) = 8.909, p = 0.00289$ ]. From Figures 4d and 5e, we notice that there is a significant overlap  
218 among subjects who had a higher peak force rate in the high effort environment and those who moved faster  
219 in the high effort environment. Specifically, subjects 6, 7, 11 and 13 who have higher peak velocity in the  
220 high effort environment also grip faster in the high effort environment. This provides more evidence in  
221 support of the notion that these subjects view the high effort environment as better than the low effort  
222 environment.

223 Following the ramp-up phase, subjects harvested berries. In contrast to the grip ramp-up phase, we found  
224 no consistent effect of environment effort ( $p = 0.690$ ) on number of berries collected (Figure 5h), even  
225 when focusing on only the probe trials ( $p = 0.621$ ). Finally, we focused on the behavior as the subjects  
226 ended the harvest period and reduced their grip force, termed giving-up phase (Figure 5a), or the duration  
227 that subjects waited in a patch gripping after collecting their last berry. Since the duration between  
228 consecutive berries increased with time spent in the patch, this metric was normalized to the time  
229 experienced waiting between the second-to-last and last berries. We found that this normalized giving-up  
230 time was modulated significantly by environment effort (Figure 5i [two-way repeated measures ANOVA,  
231 main effect of effort;  $F(1,264) = 5.437, p = 0.0205$ ]). That is, in the high effort environment, the  
232 subjects waited longer before giving up. Importantly, we found no significant effect of environment  
233 [ $F(1,1382) = 2.088, p = 0.149$ ].

234 In summary, for identical immediate effort and reward opportunities, movement vigor tended to be  
235 modulated by the subject's history of experience. Following a history of high effort expenditure, people  
236 reached with reduced velocity in probe trials. Following a history of high effort, subjects did not  
237 significantly modulate the amount of reward that they harvested. However, they took longer to begin  
238 harvesting reward (grip ramp-up period) and waited longer before ending the harvest and moving on to the  
239 next patch (giving-up phase).

240

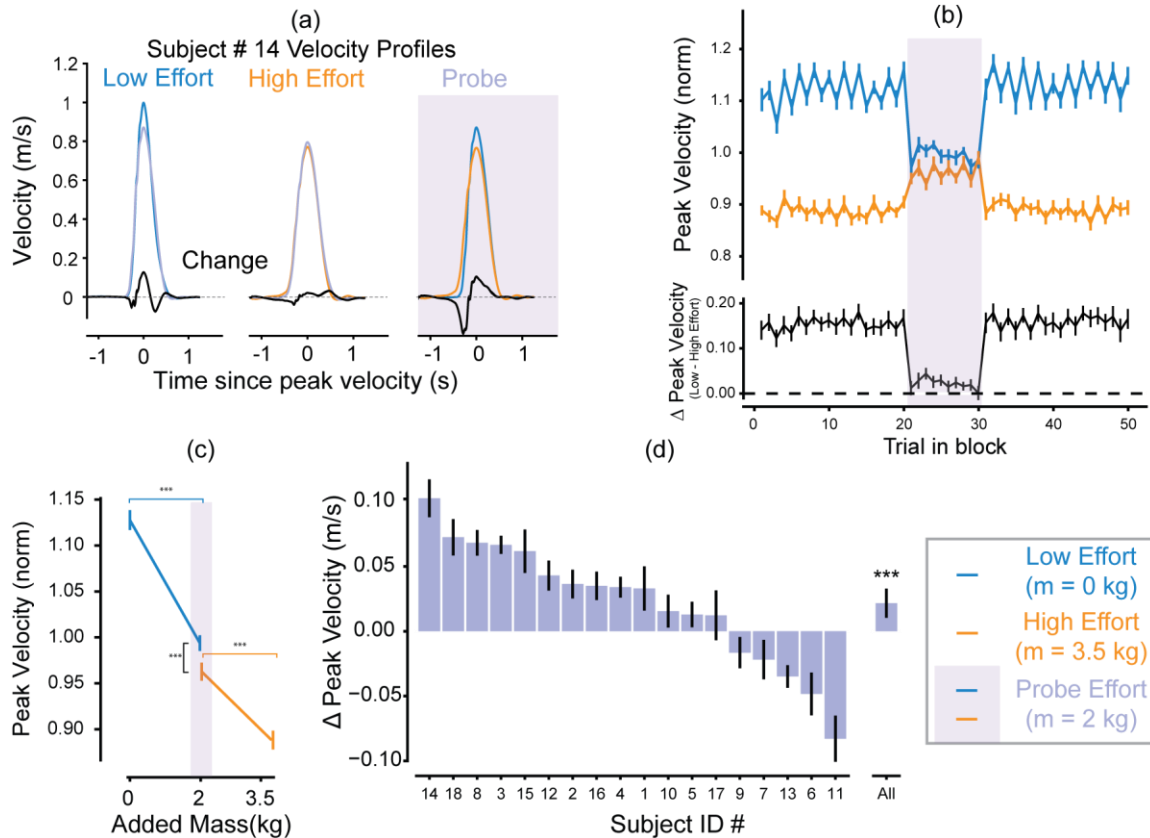

241 Figure 4: Vigor was influenced by history of effort. (a) Averaged velocity profiles for different mass conditions, 0kg  
 242 (blue), 2kg (purple background) and 3.5 kg (yellow), for an exemplar subject 14. (b) Mean peak velocity (normalized to  
 243 subject average) within a block of 50 trials, averaged across subjects, plotted as a function of trial for the low (blue) and  
 244 high (yellow) effort environments. Corresponding difference  $\Delta PV$  is plotted with respect to trial number within block right  
 245 below. All error bars represent standard error of the mean. (c) Peak velocity plotted as a function of added mass  
 246 averaged across subjects. (d) Average difference in peak velocity between corresponding probe trials in low effort  
 247 environment and high effort environment ( $\Delta PV^{probe} = PV_{low}^{probe} - PV_{high}^{probe}$ ) for each subject; bars are arranged in  
 248 descending order of  $\Delta PV$ . Most subjects have a mean positive  $\Delta PV$  indicating that they move on average faster in the  
 249 probe trials belonging to the low effort environment.

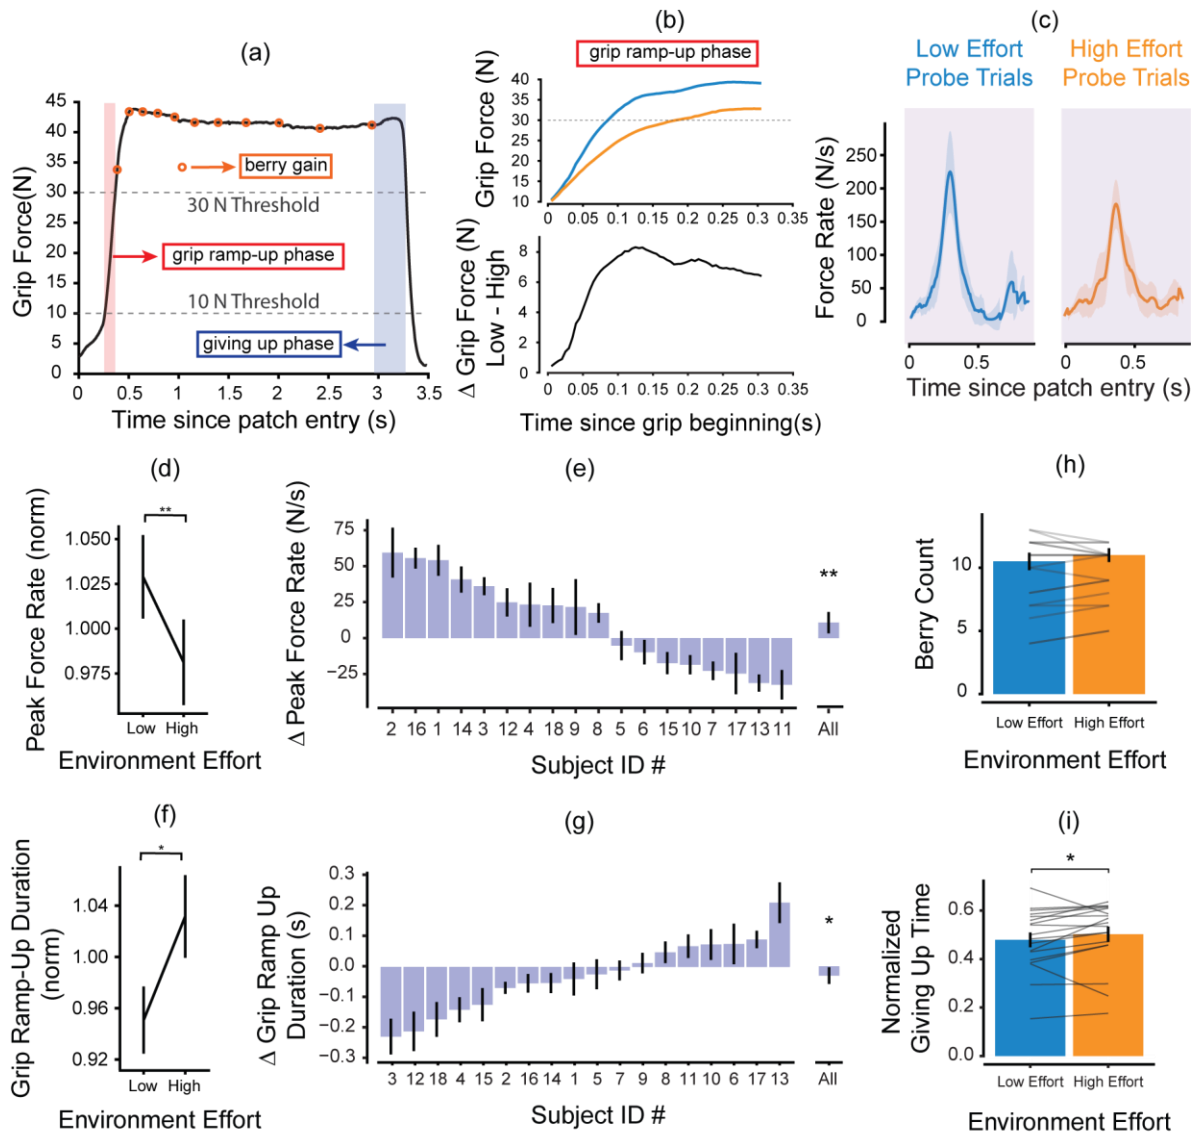

251 Figure 5: Harvest behavior is modulated by history of effort (a) A sample grip force profile for an example subject 14  
 252 on a randomly selected trial to indicate the temporal decision phases when inside a patch. (b) Zooming in on the grip  
 253 ramp up phase we compare the grip force profiles between two probe trials for subject 14, one from the low effort  
 254 environment (blue) and the other from the high effort environment (orange). (c) Force rate profiles for subject # averaged  
 255 across probe trials within the two environments; peak force rate in the probe trials belonging to the low effort  
 256 environment was higher than that of the high effort environment. (d) Peak force rate – the maximum rate of force  
 257 generation during ramp-up phase– normalized to subject average, was lower in probe trials belonging to the high effort  
 258 environment. (e) Most subjects had a positive  $\Delta$ Peak force rate. (f) Grip Ramp-up Duration – which is computed as the  
 259 duration from when the force is at 10N to when the force is at 30 N – increased in the probe trials belonging to the high effort  
 260 environment as opposed to the low effort environment. (g) Mean difference in harvest reaction time in probe trials  
 261 between environments. As expected,  $\Delta$ Harvest reaction time is negative, for most subjects. (h) Berry count modulation  
 262 by environment was not statistically significant. (i) Giving-up time, normalized to the wait time between the last two  
 263 berries, increased in the high effort environment.

## 264 Discussion

265

266 During foraging, the decision-making and movements of an individual may be linked via a single normative  
267 utility: the sum of rewards acquired, minus efforts expended, divided by time (Shadmehr & Ahmed, 2020).  
268 A prediction of this theory is that the history of reward should affect decision-making during harvesting,  
269 and movements during travel. Indeed, we found that people harvested longer and moved slower following  
270 a history of low reward (or high effort), and harvested for a shorter duration and moved faster following a  
271 history of high reward (or low effort). History of effort had a similar effect on reach vigor: following a  
272 history of high effort expenditure, people reduced their reach velocity in probe trials. However, unlike the  
273 theoretical predictions, history of high effort did not encourage longer harvest durations. Rather, it slowed  
274 the force production patterns that initiated and ended the harvest.

275 History of reward and effort influenced both the choice of how long to harvest, and the control of movement  
276 vigor to the next opportunity. There is a large body of work demonstrating that humans and other animals  
277 modulate their harvest duration in patches based on reward history in accordance with MVT (Constantino  
278 & Daw, 2015; Hills et al., 2012; Krebs et al., 1974; Le Heron et al., 2020; Wikenheiser et al., 2013; Wolfe,  
279 2017; Yoon et al., 2018). In contrast, the influence of reward history on movement vigor between patches  
280 is considerably less understood. Our observation that movement vigor is also modulate in accordance with  
281 MVT indicate that similar processes underlie the control of movement and decision making.

282 In the context of options immediately available, recent work has revealed a link between movement vigor  
283 and preference. For instance, it has been shown that humans (Sackaloo et al., 2015; Summerside et al.,  
284 2018) and other animals (Mosberger et al., 2016; Opris et al., 2011) are willing to be energetically  
285 inefficient by reaching faster, and even reacting sooner, towards increased reward. This invigoration has  
286 been reflected in saccades as well with faster velocities (Haith et al., 2012; Reppert et al., 2015) and shorter  
287 reaction times (Kawagoe et al., 1998; Takikawa et al., 2002) observed for higher reward at the end of the  
288 movement. Added effort also appears to slow down reaching and walking movements (Gordon et al., 1994;  
289 Ralston, 1958; Shadmehr et al., 2016). Moreover, when choosing between options immediately available,  
290 movement vigor reveals our underlying subjective valuation. People saccade faster to the option ultimately  
291 chosen (Korbisch et al., 2019; Reppert et al., 2015; Yoon et al., 2018). Our contribution in this work is to  
292 demonstrate that this connection between movement vigor and decision making is observed not only for  
293 immediate reward, but for the history of reward as well. Specifically, we observe a consistent effect of  
294 local availability of reward as well as the history of reward on the control of vigor.

295 In the field of motor control, the history of actions performed has also been shown to play a role in  
296 determining the kinematics of subsequent movements. In fact, research has shown that movement  
297 repetitions lead to an experience-dependent learning process whereby the brain learns to reduce variability  
298 of performance towards previously repeated targets (Diedrichsen et al., 2010; Verstynen & Sabes, 2011).  
299 This has been postulated to be a trial-by-trial learning process of the statistics of the previous actions with  
300 a bias-variance tradeoff strategy explaining selected action kinematics in relation to allowed preparation  
301 time. This is observed in bias in speed as well as reaction time of repeated movements (Hammerbeck et al.,  
302 2014; Mawase et al., 2018). This use-dependent effect is however separable from another history dependent  
303 phenomenon observed whereby subjects use a cognitive, predictive strategy when deciding subsequent  
304 movements in the presence of uncertainty (Marinovic et al., 2017). But what about the effect of dissimilar  
305 actions and their outcomes on subsequent movement kinematics? The optimal foraging framework thus  
306 seeks to explain durations of different actions, by defining a unifying ecological utility that the actions and  
307 their durations modulate. Our findings demonstrate that both the local context of reward and effort as well  
308 as the history of reward and effort significantly affect vigor.

309 Consistent with the predictions of the generalized MVT, people traveled more slowly following a history  
310 of high effort. These results are however at odds with those presented by Yoon and colleagues for saccade

311 vigor. They found that after history of high effort, imposed by high eccentricity of images, while gaze  
312 increased in accordance with the theorem, saccade velocity also increased. In other words, subjects made  
313 faster saccades in a poorer environment when moving across equivalent distances between images of  
314 identical eccentricity. This result was discussed by the authors as being more aligned with a framework in  
315 which effort expenditure elevated the subjective reward value in the environment. This elevation of the  
316 reward due to effort expenditure is referred to as *justification of effort* whereby the same reward higher is  
317 valued more if more effort was required to obtain it (Klein et al., 2005; Tricia, S et al., 2000). Though Yoon  
318 et al's results contrast with ours, in our experiment 2, we found that some subjects moved faster in the high  
319 effort environment as opposed to the low effort environment in the probe trials. The justification of effort  
320 phenomenon could explain these inter-individual differences.

321 In the context of modulated travel effort, we found that some aspects of harvest behavior were modulated  
322 by effort history (Figure 5). Specifically, we also find modulation in giving-up duration, a metric that has  
323 been used to define how long an animal remains in a patch without reward before leaving. In previous  
324 discrete reward foraging scenarios, an increase in giving-up duration has been seen to reflect the forager's  
325 perception of environment quality or capture rate. For instance, birds have been known to have a longer  
326 giving-up time in poorer environments as opposed to poorer environments (Krebs et al., 1974). As in the  
327 literature, and per the prediction of MVT, we find that subjects take longer before giving-up in the high  
328 effort environment, aka, the worse environment with the lower opportunity cost.

329 The neural correlates of reward history remain poorly understood. Dopamine levels in the nucleus  
330 accumbens correlate with reward rate, as well as shorter response latencies (Mohebi et al., 2019). However,  
331 the source of the increase remains elusive since in that same task, tonic firing rate of dopaminergic neurons  
332 do not track the history or reward or punishment (Cohen et al., 2015; Mohebi et al., 2019). A clue to this  
333 puzzle may lie in another neurotransmitter: serotonin. Tonic firing rates of serotonergic neurons can reflect  
334 history of reward, with other serotonin neurons encoding history of punishment (Cohen et al., 2015).  
335 Artificial activation of serotonin neurons leads to increased harvest durations in a foraging task (Lottem et  
336 al., 2018), as well as reduced movement vigor (Correia et al., 2017; Seo et al., 2019). Taken together, these  
337 results suggest that serotonin may play a role in moderating decision making and movement vigor during  
338 foraging via an encoding of reward history.

339 Not all of our findings conformed with MVT predictions. Previous work has found that after longer travel  
340 delays, birds will stay longer and collect more food in subsequent patches with depleting rewards (Cuthill  
341 et al., 1990). This has been shown in humans as well, where individuals harvesting reward from virtual  
342 trees will collect more apples after a longer travel delay (Constantino & Daw, 2015). These imposed travel  
343 delays seek to reduce the average capture rate of the foraging environment and therefore led to longer stay  
344 times. However, in our study we see a lack of modulation of the absolute number of berries collected in  
345 response to changing environment quality due to change in travel effort. In our protocol, each berry is  
346 associated with a short high-pitched beep, providing a salient signal regarding the number of berries  
347 harvested. We believe that subjects settle on several berries that leads to a predictable auditory pattern, that  
348 in turn acts as a cue as to when to leave a patch. In other words, subjects learn to expect a certain number  
349 of berries irrespective of reward rate due to the auditory feedback, rather than deciding on a per-patch basis.  
350 There has been some conflicting evidence for (Mcnair, 1982) and against (Krebs et al., 1974) the  
351 phenomenon of predators expecting a set number of prey, or hunting by expectation as opposed to a strategy  
352 based on MVT. Nevertheless, in our protocol for experiment 2 we believe that the increased saliency  
353 associated with the number of berries primes subjects to collect a fixed number between environments.  
354 Notably, in experiment 1, where auditory feedback was not linked to number of berries, we observed a  
355 consistent effect of environment on berries harvested, in accordance with MVT predictions.

356 The MVT framework presents an implicit, circular solution (Stephens & Krebs, 1986) for the optimal  
357 durations it prescribes, which are dependent on the very quantity it tries to optimize. This leads to the  
358 assumption that the forager has complete knowledge of  $J$ , on which its corollaries especially rely. Therefore,  
359 the theorem is unable to account for transients where the agent needs to learn the quality of the environment  
360 as a parameter that can be updated (Mcnamara & Houston, 1985). In our data, we see that the environment's  
361 influence of vigor appears to get washed out by the final block of the environment with the difference  
362 between the probe trials' vigor vanishing to zero. Further the theorem does not allow for stochasticity in  
363 the environment, as it does not account for fluctuating beliefs of the forager regarding the quality (Oaten,  
364 1977). This has been critiqued in the ecology literature by several studies that have presented alternatives  
365 (Green, 1980; McNamara & Houston, 1985; Oaten, 1977; Pyke, 2019). Yet, despite the criticism, empirical  
366 studies show that humans and animals consistently behave according to the theorem's predictions. There is  
367 now a push to understand the underpinnings of everyday decisions from an ethological standpoint (Hayden,  
368 2018; Mobbs et al., 2018) through more naturalistic experiment designs that better reflect decisions faced  
369 by individuals every day. The integration of motor control into the theory is therefore promising in its ability  
370 to not just explain motor characteristics, but also evaluation of rewards and costs by investigating  
371 corresponding motor decisions.

372 In conclusion, for identical immediate reward and effort opportunities, harvest duration and movement  
373 vigor were modulated by the history of reward and effort. People harvested longer and moved slower  
374 following a history of low reward, and conversely, harvested for a shorter duration and moved faster  
375 following a history of high reward. In accordance with the maximization of common normative utility,  
376 history of reward and effort exerted a consistent effect on not only the choice of how long to stay in the  
377 current patch but how fast to move to the next one.

378



## 379 **Materials and Methods:**

### 380 **Theoretical Development:**

381 Here we describe the hypotheses of the generalized marginal value theorem (MVT) in detail.  
382 Mathematically, the marginal capture rate of a patch is represented by  $f_n(t_h)$  (Eq. 1);  $r(t_h)$  and  $u_h(t_h)$   
383 represent the reward obtained in the patch and corresponding costs incurred as a function of harvest  
384 duration, respectively.  $f_n(t_h)$  is also called the harvest function and can be thought of as the *net* intake from  
385 a patch. Additionally, we represent the cost associated with moving to the patch, or movement expenditure,  
386 as  $u_m(d, t_m^{(n)})$ . The average capture rate of the environment is consequently given by  $\bar{J}$  (Eq. 2) as the *net*  
387 *gain* associated with a patch (harvest function minus movement expenditure to patch) divided by the sum  
388 of the total time moving to and harvesting from each patch, for all patches.

$$389 \quad f_n(t_h) = r(t_h) - u_h(t_h) \quad (1)$$

$$390 \quad \bar{J} = \frac{\sum_n f_n(t_h^{(n)}) - u_m(d, t_m^{(n)})}{\sum_n t_h^{(n)} + t_m^{(n)}} \quad (2)$$

391 Differentiating  $\bar{J}$  in Eq. 2 with respect to  $t_h$  and  $t_m$  and equating to zero returns the optimal solutions.  $t_h^*$  is  
392 the duration at which the marginal capture rate of a patch equals  $\bar{J}$ , the average capture rate of the  
393 environment. Similarly,  $t_m^*$  is the movement duration for which the movement expenditure rate equals  $\bar{J}$  in  
394 magnitude. These solutions for optimal harvest duration and movement vigor lead us to two predictions of  
395 the theorem:

- 396 1. An increase in the effort needed to harvest ( $u_h$ ) in the patch, or the effort needed to move to the patch  
397 ( $u_m$ ), should produce an increase in harvest duration, and a decrease in movement speed.
- 398 2. After a history of high effort, or in expectation of high effort, harvest duration should increase, and  
399 movement vigor should decrease.

400 The normative MVT model used by Yoon et al (Yoon et al., 2018) naturally incorporates experience and  
401 subsequent behavior when describing vigor of movements as well as persistence to stay in patch. To test if  
402 these predictions hold for arm reaching, we designed a patch foraging task involving reaching movements.  
403 The effort of a reach was based on the effort cost model described by (Shadmehr et al., 2016) (Eq 3). In our  
404 experiment, we chose to modulate the effort of arm reaches by changing the mass required to be carried  
405 during the movement.  $m$  was the mass carried during movement,  $d$  was the distance travelled and  $t_m$  was  
406 the duration.

$$407 \quad u_m(d, t_m) = a m t_m + b \frac{m d^2}{t_m} \quad (3)$$

408 Further, desire to remain in a patch was fueled by point-based reward that depleted with time spent and was  
409 discounted by effort required while harvesting points in a patch. This harvest effort was realized through a  
410 force that the subject had to apply through production of grip forces to earn points in a patch. Grip force  
411 required in a patch was given by  $F_g$ ; so, for harvest duration  $t_h$ , the effort associated with grip force in a  
412 patch was given by  $u_h(t_h)$  (Eq. 4).

$$413 \quad u_h(t_h) = F_g * t_h \quad (4)$$

414 To test the predictions of the theory, we designed a foraging protocol in which subjects collected rewards  
415 in two environments, one with high effort, and the other with low effort (Figure 2). Subjects reached  
416 between patches. Once in a patch, they produced a grip force to harvest reward. In one environment, most

417 trials had no added mass (Eq. 3;  $m = 0$ ), while in the second environment most trials had high added mass  
418 ( $m = 3.5 \text{ kg}$ ). In both environments, they experienced some trials with intermediate added mass ( $m =$   
419  $2 \text{ kg}$ ). All patches required a constant grip force ( $F_g = 30 \text{ N}$ ).

420 For our experiment design, we have the following predictions based on our hypotheses:

421 H1. Subjects will move faster in the probe trials belonging to the better environment (high reward or  
422 low effort), as compared to the poorer environment.

423 H2. Similarly, we expect that subjects will shorten their harvest duration in the better environment (high  
424 reward or low effort), as compared to the poorer environment. Specifically, we compare the  
425 equivalent probe trials between the two environments to isolate the effects of reward and effort  
426 history in the two experiments.

427

### 428 **Experiment Protocol and Design:**

429 *Subjects:* Thirty-four subjects (age=  $25.5 \pm 3.5$  years, 15 female) participated in the study, fourteen in  
430 experiment 1 and twenty in experiment 2. All subjects were healthy with no recent injuries or known  
431 pathologies. Consent was obtained in accordance with the University of Colorado Institutional Review  
432 Board. Subjects were paid a base amount of \$10 an hour, but their final compensation depended on their  
433 performance. Two subjects were unable to complete the experiment due to their selection of very long  
434 harvest duration in experiment 2 and therefore results for this session presented are from the 18 subjects  
435 who completed all the trials in the experiment.

436 *Apparatus and Data Acquisition:* To test predictions of MVT in humans, a foraging task involving arm  
437 reaching movements was designed. Subjects were seated in a chair with full back support and made  
438 horizontal, planar reaches while grasping the handle of a robotic manipulandum (InMotion 2; Interactive  
439 Motion Technologies, Shoulder-elbow robot 2) as seen in Figure 2a. By moving the robot handle subjects  
440 controlled the movement of a cursor on the monitor placed at eye-level. The monitor displayed a game  
441 screen in which they were cued to move to different targets, causing them to make reaches in different  
442 directions in the horizontal plane. The end of the robot handle was attached with a grasp sensor that  
443 measured force with which subjects gripped the handle. Additionally, the robot could produce forces; here  
444 we leveraged this by having the robot produce acceleration-dependent resistive forces to simulate the effect  
445 of adding mass to the reach in the horizontal plane for experiment 2 (Eq. 5). Robot forces were inactive  
446 during experiment 1.

$$447 \quad [F_x \ F_y] = -1 * \begin{bmatrix} m & 0 \\ 0 & m \end{bmatrix} * [a_x \ a_y] \quad (5)$$

448 Reach position, velocity, acceleration, and corresponding grip force of every trial was recorded by the robot  
449 at a frequency of 200 Hz. The force field produced by robot motors during a reach was also continuously  
450 updated, based on the current acceleration as recorded by the accelerometer, at a rate of 200 Hz.

451 *Experiment 1:* This experiment emulated a patch foraging task in which subjects could move between  
452 patches by making reaching movements with their dominant arm (Figure 2a). On the screen in front of them  
453 the foraging task appeared; subjects were instructed to move their cursor into a circular patch of reward on  
454 the screen (Figure 2b). Once their cursor was in the patch, they could collect reward by making pulsed grip  
455 forces (Figure 2c). Subjects had to wait for the patch to turn green upon which they were required to hit a  
456 threshold force of 30 N and return their force back to under 10 N, at which point they received rewarding  
457 ‘berries’. Subjects could wait for the patch to turn green to collect more reward or move on to the next at

458 any time. Their total earnings from a patch were added to a cumulative score counter at the top of the screen.  
459 An example grip force profile is seen in Figure 2e.

460 Overall, subjects experienced three patch types with differing reward, each indicated by a different patch  
461 color (Figure 2d). Reward was dispensed per grip according to an exponential decay function, jittered by  
462 gaussian noise  $r(n) \sim N(\beta^{n-1} \alpha, 1)$ , where  $\alpha$  represents the maximum reward that can be obtained from a  
463 pulse, and  $\beta$  represents the decay rate fixed at 0.8 for the entirety of this experiment. the first pulse always  
464 resulted in the maximum reward,  $r(1) = \alpha$  (Figure 2f).

465 Before the main experiment, subjects were familiarized with the patch types with 30 trials, 10 for each  
466 reward value. Subjects were questioned about which patch was the most rewarding to ensure they had  
467 internalized the color-reward mapping. If they responded incorrectly, they were re-familiarized. No subject  
468 required more than 2 familiarization sessions; familiarization data were not included in any analyses  
469 presented.

470 *Experiment 2:* In this experiment, the effort of travel was modulated by adding mass to the reaches between  
471 the patches. A brief familiarization session was conducted to acquaint subjects to the passive inertial forces  
472 of the robot arm as well as the acceleration-dependent force-field. Subjects were then required to collect  
473 berries in a task similar to experiment 1. The available patch was displayed by a red circle. Subjects moved  
474 the robot handle and placed a cursor inside the patch. Once inside the patch, they produced a grip force that  
475 was specified by an indicator next to the patch circle (Figure 2g). Harvesting began when the grip force  
476 reached the minimum required force. Berry harvesting was indicated by an animation: an orange circle  
477 quickly appearing and disappearing, accompanied by a high-pitched beep. Berries were harvested at a  
478 declining rate while the grip force was maintained above the minimum level. The total number of berries  
479 collected over a duration  $t_h$  was specified by the function  $r(t_h) = \alpha (1 - \frac{1}{1+\beta t_h})$ . Essentially, the time  
480 between successive berries at any given instance was calculated from the instantaneous reward rate  
481 resulting in consecutive berries having longer durations between them as time spent in the patch increased.  
482 Here,  $\alpha$  represents the maximum reward and  $\beta$  represents rate of decline in reward harvested. Subjects were  
483 instructed to hold their force at the required level and reduce it only when they intended to move out of the  
484 patch, i.e., they were discouraged from ‘resting’ inside the patch. They were told that they were free to  
485 leave the current patch at any point in time towards the cued position where a new patch would appear.  
486 Once they exited a patch, it disappeared, and a new replenished patch appeared in the new location (Figure  
487 2g). Patches always appeared at the same two positions thereby keeping the travel distance constant at  $d =$   
488  $30\text{ cm}$  across the entire experiment. Subjects ( $n=18$ ) experienced the foraging task in two main blocks of  
489 trials: low mass and high mass environments. Travel effort was modulated by changing the added mass  $m$   
490 to the reach period and harvest effort was represented by the amount of grip force that was to be maintained  
491 to ensure berry “consumption”.

492 Subjects experienced three effort levels with three different values of added mass. This was cued to the  
493 subject by means of cursor appearance (Figure 2h). The protocol entailed foraging in two environments.  
494 The low effort environment entailed no added mass ( $m = 0\text{ kg}$ ) for most trials. The high effort environment  
495 entailed large added mass ( $m = 3.5\text{ kg}$ ). Both environments had probe trials in which the added mass was  
496  $m = 2\text{ kg}$ . Each environment contained two hundred trials that was divided into four sub-blocks of fifty  
497 trials each, not including 30 trials in which subjects were familiarized with the parameters of the  
498 environment. Subjects were not informed of the total number of trials in each environment. Rather, they  
499 were told that the total session duration was about one hour and fifteen minutes, including instruction and  
500 consent procedures. Within each sub-block of fifty, the middle ten trials were designated as probe thereby  
501 leading to forty total probe trials in each environment. There was no discernable break between trials in the

502 two environments. For all trials in both environments, including probe trials, the minimum amount of grip  
503 force required to harvest berries within each patch was fixed ( $F_g \geq 30N$ ).

504 When travelling between the two patches, the amount of added mass was indicated by means of a modified  
505 cursor. Subjects were also instructed not to increase the grip force during travel between patches, to  
506 decouple harvest and movement efforts. If they chose to travel with increased grip force ( $> 10 N$ ), the game  
507 paused, a message appeared on screen asking them to reduce their grip force. Subjects were also informed  
508 that every 10 berries collected would correspond to 1¢ in monetary bonus, to increase task engagement.

509 In both experiments, environment order was counterbalanced across subjects.

510 *Behavioral metrics of movement and harvest:* In experiment 1, our primary hypothesis concerns the  
511 modulation of movement vigor by changing the history of reward. Since movement is realized through  
512 reaches between patches, we compute the maximum velocity in the horizontal direction over the time course  
513 of the reach and use it to quantify the vigor of the movement. The horizontal velocity is chosen because the  
514 primary movement happens in that direction by virtue of the position of all the patches being along the  
515 horizontal axis. Therefore, vigor is quantified through peak velocity of reaching.

516 For harvest behavior, we use two metrics. One is the absolute number of berries harvested per patch to  
517 denote harvest behavior in the patch. The next metric is the absolute duration of harvest within a patch since  
518 patch entry to patch exit in seconds. Therefore, harvest behavior is quantified by berries harvested as well  
519 as harvest duration.

520 For experiment 2, our primary hypothesis here is concerned with how movement vigor is modulated by  
521 changing the history of effort. As in the previous experiment, the horizontal velocity is chosen because the  
522 primary movement happens in that direction by virtue of the position of all the patches being along the  
523 horizontal axis.

524 We quantified behavior using four metrics: harvest reaction time, peak force rate, number of berries, and  
525 giving-up time. Rate of force was computed as the numerical derivative of force over the course of the trial  
526 which was then filtered through a low-pass Butterworth filter with a 10Hz cut-off frequency. Since this  
527 was a grip-and-hold task. The harvest reaction time was defined as the duration from when subjects increase  
528 grip force above 10 N until the point at which they reach the required threshold of 30 N. Peak force rate  
529 was the maximum rate of force generation during the grip ramp-up period. Together, harvest reaction time  
530 and peak force rate determined the speed with which the subjects began harvest following arrival in the  
531 patch. The number of berries per patch was computed as the total number of berries in a patch that subjects  
532 collect. Finally, we computed giving-up time as the duration after the last berry was collected until they  
533 reduced the grip force below the minimum. Because berries were dispensed after increasingly long  
534 intervals, this quantity was normalized to the duration between the second to last and last berries collected.

535 *Statistical Analyses:* Therefore, based on our design, each environment had two trial types— exemplar trials  
536 (representing the actual attributes of the environment) and probe trials (different from exemplar but  
537 equivalent across environments). MVT predicts an effect of immediate reward and effort, i.e., if reward  
538 increases, or effort decreases, it should equivalently affect vigor as well as harvest duration. This was tested  
539 by comparing exemplar trials across both environments. The critical test for MVT in this case comes from  
540 the comparison of probe trials between the two environments. We therefore combined all the trials across  
541 each environment and obtained average behavior across the block of fifty trials. This captures temporal  
542 behavior as well differences between environments. We performed a two-way repeated measures ANOVA  
543 on each trial type to obtain the effects of environment as well as the effect of trail number within block.

544 The two equations representing these ANOVAs for each trial type are presented (Equations 9 & 10). *Met*  
545 represents the above metrics for movement vigor as well as harvest duration.

546 
$$Met_{exemplar} \sim Env + trialInBlock + Error(Subj) \#(9)$$

547 
$$Met_{probe} \sim Env + trialInBlock + Error(Subj)\#(10)$$

548 We also completed 6 post-hoc t-tests based on observing the data to test the effect of the transitioning  
549 between exemplar and probe trials for each metric. This helped us determine if the sudden changes in  
550 harvest duration and peak velocity before the transition compared to neighboring trials of the same trial  
551 type were statistically significant. For harvest duration we compared trials 29 and 30 and trials 30 and 31  
552 in the block average for each subject in the low reward environment. Correspondingly in the high reward  
553 environment we compared trials 19 and 20 as well as trials 20 and 21. For peak velocity in the low reward  
554 environment we compared trials 30 and 31 as well as trials 31 and 32. And for the high reward environment  
555 we compared trials 20 to 21 and trials 21 to 22 within the block averages for each subject.

556 We use a statistical threshold of  $\alpha = 0.05$  for all comparisons. P-values are reported exactly unless they  
557 are less than 0.001 in which they are reported as such. All the F-statistics, confidence intervals and p-values  
558 are reported in the results for each metric.

559

## 560 **References:**

561 Charnov, E. L. (1976). *Optimal Foraging , the Marginal Value Theorem*. 136, 129–136.

562 Cohen, J. Y., Amoroso, M. W., & Uchida, N. (2015). Serotonergic neurons signal reward and punishment  
563 on multiple timescales. *ELife*, 2015(4), 1–25. <https://doi.org/10.7554/eLife.06346>

564 Constantino, S. M., & Daw, N. D. (2015). Learning the opportunity cost of time in a patch-foraging task.  
565 *Cognitive, Affective, & Behavioral Neuroscience*, 15, 837–853. [https://doi.org/10.3758/s13415-015-](https://doi.org/10.3758/s13415-015-0350-y)  
566 0350-y

567 Correia, P. A., Lottem, E., Banerjee, D., Machado, A. S., Carey, M. R., & Mainen, Z. F. (2017). Transient  
568 inhibition and long-term facilitation of locomotion by phasic optogenetic activation of serotonin  
569 neurons. *ELife*, 6, 1–27. <https://doi.org/10.7554/eLife.20975>

570 Cowie, R. J. (1977). Optimal foraging in great tits (Parus Major). *Nature*, 268(July), 137–139.  
571 <https://doi.org/https://doi.org/10.1038/268137a0>

572 Cuthill, I. C., Kacelnik, A., Krebs, J. R., Haccou, P., & Iwasa, Y. (1990). Starlings exploiting patches: the  
573 effect of recent experience on foraging decisions. *Animal Behaviour*, 40(4), 625–640.  
574 [https://doi.org/10.1016/S0003-3472\(05\)80692-X](https://doi.org/10.1016/S0003-3472(05)80692-X)

575 Diedrichsen, J., White, O., Newman, D., & Lally, N. (2010). Use-Dependent and Error-Based Learning of  
576 Motor. *Journal of Neuroscience*, 30(15), 5159–5166. [https://doi.org/10.1523/JNEUROSCI.5406-](https://doi.org/10.1523/JNEUROSCI.5406-09.2010)  
577 09.2010

578 Gordon, J., Ghilardi, M. F., Cooper, S. E., & Ghez, C. (1994). Accuracy of planar reaching movements -  
579 II. Systematic extent errors resulting from inertial anisotropy. *Experimental Brain Research*, 99(1),  
580 112–130. <https://doi.org/10.1007/BF00241416>

581 Green, R. F. (1980). Bayesian Birds: A Simple Example of Oaten's Stochastic Model of Optimal  
582 Foraging. *Theoretical Population Biology*, 244–256.



- 583 Haith, A. M., Reppert, T. R., & Shadmehr, R. (2012). Evidence for Hyperbolic Temporal Discounting of  
584 Reward in Control of Movements. *Journal of Neuroscience*.  
585 <https://doi.org/10.1523/JNEUROSCI.0424-12.2012>
- 586 Hammerbeck, U., Yousif, N., Greenwood, R., Rothwell, J. C., & Diedrichsen, J. (2014). Movement speed  
587 is biased by prior experience. *Journal of Neurophysiology*, *111*(1), 128–134.  
588 <https://doi.org/10.1152/jn.00522.2013>
- 589 Hayden, B. Y. (2018). *Economic choice : the foraging perspective*. 1–6.  
590 <https://doi.org/https://doi.org/10.1016/j.cobeha.2017.12.002>
- 591 Hayden, B. Y., Pearson, J. M., & Platt, M. L. (2011). Neuronal basis of sequential foraging decisions in a  
592 patchy environment. *Nature Neuroscience*, *14*(7), 933–939. <https://doi.org/10.1038/nn.2856>
- 593 Hills, T. T., Jones, M. N., & Todd, P. M. (2012). Optimal foraging in semantic memory. *Psychological*  
594 *Review*, *119*(2), 431–440. <https://doi.org/10.1037/a0027373>
- 595 Kawagoe, R., Takikawa, Y., & Hikosaka, O. (1998). Expectation of reward modulates cognitive signals  
596 in the basal ganglia. *Nature Neuroscience*, *1*(5), 411–416. <https://doi.org/10.1038/1625>
- 597 Klein, E. D., Bhatt, R. S., & Zentall, T. R. (2005). Contrast and the justification of effort. *Psychonomic*  
598 *Bulletin and Review*, *12*(2), 335–339. <https://doi.org/10.3758/BF03196381>
- 599 Korbisch, C., Apuan, D., & Ahmed, A. A. (2019). Saccade vigor reveals relative utility in effort-based  
600 choice. *Motor Learning and Motor Control Symposium*.
- 601 Krebs, J. R., Ryan, J. C., & Charnov, E. L. (1974). Hunting by expectation or optimal foraging? A study  
602 of patch use by chickadees. *Animal Behaviour*, *22*(PART 4), 953–964. [https://doi.org/10.1016/0003-](https://doi.org/10.1016/0003-3472(74)90018-9)  
603 [3472\(74\)90018-9](https://doi.org/10.1016/0003-3472(74)90018-9)
- 604 Le Heron, C., Kolling, N., Plant, O., Kienast, A., Janska, R., Ang, Y. S., Fallon, S., Husain, M., & Apps,  
605 M. A. J. (2020). Dopamine Modulates Dynamic Decision-Making during Foraging. *Journal of*  
606 *Neuroscience*, *40*(27), 5273–5282. <https://doi.org/10.1523/JNEUROSCI.2586-19.2020>
- 607 Lottem, E., Banerjee, D., Vertech, P., Sarra, D., Lohuis, M. O., & Mainen, Z. F. (2018). Activation of  
608 serotonin neurons promotes active persistence in a probabilistic foraging task. *Nature*  
609 *Communications*, *9*(1), 1–12. <https://doi.org/10.1038/s41467-018-03438-y>
- 610 Marinovic, W., Poh, E., De Rugy, A., & Carroll, T. J. (2017). Action history influences subsequent  
611 movement via two distinct processes. *ELife*, *6*, 1–23. <https://doi.org/10.7554/eLife.26713>
- 612 Mawase, F., Lopez, D., Celnik, P. A., & Haith, A. M. (2018). Movement Repetition Facilitates Response  
613 Preparation. *CellReports*, *24*(4), 801–808. <https://doi.org/10.1016/j.celrep.2018.06.097>
- 614 McNair, J. N. (1982). Optimal giving-up times and the marginal value theorem. *The American Naturalist*,  
615 *119*(4), 511–529. <https://doi.org/https://doi.org/10.1086/283929>
- 616 McNamara, J. M., & Houston, A. I. (1985). Optimal Foraging and Learning. *Journal of Theoretical*  
617 *Biology*, *117*, 231–249. [https://doi.org/https://doi.org/10.1016/S0022-5193\(85\)80219-8](https://doi.org/https://doi.org/10.1016/S0022-5193(85)80219-8)
- 618 Mobbs, D., Trimmer, P. C., Blumstein, D. T., & Dayan, P. (2018). *Foraging for foundations in decision*  
619 *neuroscience : insights from ethology*. <https://doi.org/10.1038/s41583-018-0010-7>
- 620 Mohebi, A., Pettibone, J. R., Hamid, A. A., Wong, J. M. T., Vinson, L. T., Patriarchi, T., Tian, L.,  
621 Kennedy, R. T., & Berke, J. D. (2019). Dissociable dopamine dynamics for learning and motivation.  
622 *Nature*, *570*(7759), 65–70. <https://doi.org/10.1038/s41586-019-1235-y>



- 623 Mosberger, A. C., De Clauser, L., Kasper, H., & Schwab, M. E. (2016). Motivational state, reward value,  
624 and Pavlovian cues differentially affect skilled forelimb grasping in rats. *Learning and Memory*,  
625 23(6), 289–302. <https://doi.org/10.1101/lm.039537.115>
- 626 Niv, Y., Daw, N. D., Joel, D., & Dayan, P. (2007). Tonic dopamine: Opportunity costs and the control of  
627 response vigor. *Psychopharmacology*. <https://doi.org/10.1007/s00213-006-0502-4>
- 628 Oaten, A. (1977). Optimal foraging in patches: A case for stochasticity. *Theoretical Population Biology*,  
629 12(3), 263–285. [https://doi.org/10.1016/0040-5809\(77\)90046-6](https://doi.org/10.1016/0040-5809(77)90046-6)
- 630 Opris, I., Lebedev, M., & Nelson, R. J. (2011). Motor planning under unpredictable reward: Modulations  
631 of movement vigor and primate striatum activity. *Frontiers in Neuroscience*, 5(MAY), 1–12.  
632 <https://doi.org/10.3389/fnins.2011.00061>
- 633 Perry, C. J., Baciadonna, L., & Chittka, L. (2016). Unexpected rewards induce dopamine-dependent  
634 positive emotion-like state changes in bumblebees. *Science*, 353(6307), 1529–1532.  
635 <https://doi.org/10.1126/science.aaf4454>
- 636 Pyke, G. H. . (2019). Optimal Foraging Theory : A Critical Review. *Annual Review of Ecology and*  
637 *Systematics*, 15(1984), 523–575. <https://www.jstor.org/stable/2096959>
- 638 Ralston, H. J. (1958). Energy-speed relation and optimal speed during level walking. *Internationale*  
639 *Zeitschrift Für Angewandte Physiologie Einschliesslich Arbeitsphysiologie*, 17(4), 277–283.  
640 <https://doi.org/10.1007/BF00698754>
- 641 Reppert, T. R., Lempert, K. M., Glimcher, P. W., & Shadmehr, R. (2015). Modulation of saccade vigor  
642 during value-based decision making. *Journal of Neuroscience*, 35(46), 15369–15378.  
643 <https://doi.org/10.1523/JNEUROSCI.2621-15.2015>
- 644 Richardson, H., & Verbeek, N. A. M. (1987). Diet selection by yearling northwestern crows (*Corvus*  
645 *caurinus*) feeding on littleneck clams (*Venerupis japonica*). *Auk*, 104(2), 263–269.  
646 <https://doi.org/10.1093/auk/104.2.263>
- 647 Rigoux, L., & Guigon, E. (2012). *A Model of Reward- and Effort-Based Optimal Decision Making and*  
648 *Motor Control*. 8(10). <https://doi.org/10.1371/journal.pcbi.1002716>
- 649 Sackaloo, K., Strouse, E., & Rice, M. S. (2015). Degree of preference and its influence on motor control  
650 when reaching for most preferred, neutrally preferred, and least preferred candy. *OTJR Occupation,*  
651 *Participation and Health*, 35(2), 81–88. <https://doi.org/10.1177/1539449214561763>
- 652 Schweighofer, N., Xiao, Y., Kim, S., Yoshioka, T., Gordon, J., & Osu, R. (2015). Effort, success, and  
653 nonuse determine arm choice. *Journal of Neurophysiology*, 114(1), 551–559.  
654 <https://doi.org/10.1152/jn.00593.2014>
- 655 Seo, C., Guru, A., Jin, M., Ito, B., Slezzer, B. J., Ho, Y. Y., Wang, E., Boada, C., Krupa, N. A.,  
656 Kullakanda, D. S., Shen, C. X., & Warden, M. R. (2019). Intense threat switches dorsal raphe  
657 serotonin neurons to a paradoxical operational mode. *Science*, 363(6426), 539–542.  
658 <https://doi.org/10.1126/science.aau8722>
- 659 Shadmehr, R., & Ahmed, A. A. (2020). *Vigor: Neuroeconomics of movement control*. MIT Press.
- 660 Shadmehr, R., Huang, H. J., & Ahmed, A. A. (2016). A Representation of Effort in Decision-Making and  
661 Motor Control. *Current Biology*, 26, 1–6. <https://doi.org/10.1016/j.cub.2016.05.065>
- 662 Stephens, D. W., & Krebs, J. R. (1986). Foraging Theory. In *Foraging Theory*. Princeton University  
663 Press. <https://doi.org/10.2307/j.ctvs32s6b>

- 664 Summerside, E. M., Shadmehr, R., & Ahmed, A. A. (2018). Vigor of reaching movements: Reward  
665 discounts the cost of effort. *Journal of Neurophysiology*, *119*(6), 2347–2357.  
666 <https://doi.org/10.1152/JN.00872.2017>
- 667 Takikawa, Y., Kawagoe, R., Itoh, H., Nakahara, H., & Hikosaka, O. (2002). Modulation of saccadic eye  
668 movements by predicted reward outcome. *Experimental Brain Research*, *142*(2), 284–291.  
669 <https://doi.org/10.1007/s00221-001-0928-1>
- 670 Thura, D., Cos, I., Trung, J., & Cisek, P. (2014). Context-dependent urgency influences speed-accuracy  
671 trade-offs in decision-making and movement execution. *Journal of Neuroscience*, *34*(49), 16442–  
672 16454. <https://doi.org/10.1523/JNEUROSCI.0162-14.2014>
- 673 Tricia, S. C., Feltus, J. R., Daren, H., & Zentall, T. R. (2000). “Work Ethic” in Pigeons: Reward value is  
674 directly related to the effort or time required to obtain the reward. *Psychonomic Bulletin and Review*,  
675 *7*(1), 100–106.
- 676 Verstynen, T., & Sabes, P. N. (2011). How Each Movement Changes the Next : An Experimental and  
677 Theoretical Study of Fast Adaptive Priors in Reaching. *Journal of Neuroscience*, *31*(27), 10050–  
678 10059. <https://doi.org/10.1523/JNEUROSCI.6525-10.2011>
- 679 Wang, A. Y., Miura, K., & Uchida, N. (2013). The dorsomedial striatum encodes net expected return,  
680 critical for energizing performance vigor. *Nature Neuroscience*, *16*(5), 639–647.  
681 <https://doi.org/10.1038/nn.3377>
- 682 Wang, J., Lum, P. S., Shadmehr, R., & Lee, S. W. (2021). Perceived effort affects choice of limb and  
683 reaction time of movements. *Journal of Neurophysiology*, *125*(1), 63–73.  
684 <https://doi.org/10.1152/JN.00404.2020>
- 685 Wikenheiser, A. M., Stephens, D. W., & Redish, A. D. (2013). *Subjective costs drive overly patient*  
686 *foraging strategies in rats on an intertemporal foraging task*. *110*(20).  
687 <https://doi.org/10.1073/pnas.1220738110>
- 688 Wolfe, J. M. (2017). *When is it time to move to the next raspberry bush ? Foraging rules in human visual*  
689 *search*. *13*(2013), 1–17. <https://doi.org/10.1167/13.3.10>.doi
- 690 Yoon, T., Geary, R. B., Ahmed, A. A., & Shadmehr, R. (2018). Control of movement vigor and decision  
691 making during foraging. *Proceedings of the National Academy of Sciences*, *115*(44), E10476 LP-  
692 E10485. <https://doi.org/10.1073/pnas.1812979115>
- 693
- 694
- 695
- 696
- 697
- 698
